# Supplementary material for: Kam Sweet Rice (Oryza sativa L.) Is a Special Ecotypic Rice in Southeast Guizhou, China as Revealed by Genetic Diversity Analysis
Source: Front Plant Sci. 2022 Mar 7;13:830556. doi: 10.3389/fpls.2022.830556 (PMC8940365; doi:10.3389/fpls.2022.830556)
Supplement: Supplementary file 3 [file Table_1.XLSX]

## Sheet: Sheet1
Accession ID	Population	Name	Original producing area	Ecotype
CH-1	KSR	Niu jin nuo	Guizhou	japonica
CH-2	KSR	Bai mao gu	Guizhou	japonica
CH-3	KSR	Leng he gu	Guizhou	japonica
CH-4	KSR	Bai ke zhe nuo 1	Guizhou	japonica
CH-5	KSR	Hong ke zhe nuo 2	Guizhou	japonica
CH-6	KSR	Guang tou nuo he	Guizhou	japonica
CH-7	KSR	Hei ke zhe nuo 1	Guizhou	japonica
CH-8	KSR	Liu yue gu	Guizhou	japonica
CH-9	KSR	Ba yue gu	Guizhou	indica
CH-10	KSR	Jiu yue gu	Guizhou	indica
CH-11	KSR	Liang shui gu	Guizhou	indica
CH-12	KSR	Ma zhan	Guizhou	indica
CH-13	KSR	Xi xiang he 1	Guizhou	japonica
CH-14	KSR	Xiao xiang he 1	Guizhou	japonica
CH-15	KSR	Da xiang he 1	Guizhou	japonica
CH-16	KSR	Hong mao xiang he 1	Guizhou	japonica
CH-17	KSR	Huang gang xiang he	Guizhou	japonica
CH-18	KSR	Huang mang xiang he	Guizhou	japonica
CH-19	KSR	Gou sui huang	Guizhou	japonica
CH-20	KSR	Gou jian jiu	Guizhou	japonica
CH-21	KSR	Ba yue he	Guizhou	japonica
CH-22	KSR	Gou bing dong	Guizhou	japonica
CH-23	KSR	Dang jiu hei nuo	Guizhou	japonica
CH-24	KSR	Gou gun xin	Guizhou	japonica
CH-25	KSR	Gou hei	Guizhou	japonica
CH-26	KSR	Gu guo he	Guizhou	japonica
CH-27	KSR	Hong rong he	Guizhou	japonica
CH-28	KSR	Ba dang he	Guizhou	japonica
CH-29	KSR	Hong he 1	Guizhou	japonica
CH-30	KSR	Hua lan yin suo	Guizhou	japonica
CH-31	KSR	Da hao he	Guizhou	japonica
CH-32	KSR	Hei mao he	Guizhou	japonica
CH-33	KSR	Hong mi he	Guizhou	japonica
CH-34	KSR	Luo han he	Guizhou	japonica
CH-35	KSR	Nai niao shuang	Guizhou	japonica
CH-36	KSR	Gou huang gang	Guizhou	japonica
CH-37	KSR	Gou mei	Guizhou	japonica
CH-38	KSR	Gou lie jian he	Guizhou	japonica
CH-39	KSR	Gou tu he	Guizhou	japonica
CH-40	KSR	Tong hua mi he	Guizhou	japonica
CH-41	KSR	Tong hua he 1	Guizhou	japonica
CH-42	KSR	Gou rong huang he	Guizhou	japonica
CH-43	KSR	Zao beng hong he	Guizhou	japonica
CH-44	KSR	Rong guan he	Guizhou	japonica
CH-45	KSR	Gou rong hei he	Guizhou	japonica
CH-46	KSR	Gou yang lie	Guizhou	japonica
CH-47	KSR	Guan tui bai he 1	Guizhou	japonica
CH-48	KSR	Jin jiu he	Guizhou	japonica
CH-49	KSR	Rong bang he	Guizhou	japonica
CH-50	KSR	Wu ming he	Guizhou	japonica
CH-51	KSR	Gou guan shi	Guizhou	japonica
CH-52	KSR	Gou lie jiu	Guizhou	japonica
CH-53	KSR	Gou dong	Guizhou	japonica
CH-54	KSR	Gou dang jie	Guizhou	japonica
CH-55	KSR	Gou lang xin	Guizhou	japonica
CH-56	KSR	Zhan li he	Guizhou	japonica
CH-57	KSR	Huang mao xiang he	Guizhou	japonica
CH-58	KSR	Hong xiang he	Guizhou	japonica
CH-59	KSR	Ma yao he	Guizhou	japonica
CH-60	KSR	Bing lai he	Guizhou	japonica
CH-61	KSR	Bai he	Guizhou	japonica
CH-62	KSR	Gao yu hei nuo	Guizhou	japonica
CH-63	KSR	Bai jie cao	Guizhou	indica
CH-64	KSR	Xiang he	Guizhou	japonica
CH-65	KSR	Rong he	Guizhou	japonica
CH-66	KSR	Bai xiang he	Guizhou	japonica
CH-67	KSR	Er shui zao	Guizhou	indica
CH-68	KSR	Tong he mi	Guizhou	japonica
CH-69	KSR	Ban bian nuo	Guizhou	indica
CH-70	KSR	Zi mang nuo	Guizhou	japonica
CH-71	KSR	Bai mang nuo	Guizhou	indica
CH-72	KSR	Xiao hong gu	Guizhou	indica
CH-73	KSR	Hong gu	Guizhou	indica
CH-74	KSR	Bai gu	Guizhou	indica
CH-75	KSR	Da ye ai	Guizhou	indica
CH-76	KSR	Bai gai cao	Guizhou	indica
CH-77	KSR	Hong jing gu	Guizhou	indica
CH-78	KSR	Leng shui xian	Guizhou	indica
CH-79	KSR	Ye zhu gu	Guizhou	indica
CH-80	KSR	Bai ma gu	Guizhou	indica
CH-81	KSR	Bai xiang he 1	Guizhou	japonica
CH-82	KSR	Ji zhua nuo	Guizhou	japonica
CH-83	KSR	Niu mang nuo	Guizhou	japonica
CH-84	KSR	Leng shui he	Guizhou	japonica
CH-85	KSR	Ban po he	Guizhou	japonica
CH-86	KSR	Gan tian nuo	Guizhou	indica
CH-87	KSR	Xiang ke nuo	Guizhou	japonica
CH-88	KSR	Tie he	Guizhou	japonica
CH-89	KSR	Xiao bai he	Guizhou	japonica
CH-90	KSR	Leng shui nuo	Guizhou	indica
CH-91	KSR	Qian ai nuo	Guizhou	indica
CH-92	KSR	Bai mang he	Guizhou	japonica
CH-93	KSR	Da nuo	Guizhou	japonica
CH-94	KSR	Ma ke nuo	Guizhou	indica
CH-95	KSR	Bian he	Guizhou	japonica
CH-96	KSR	Da tong he	Guizhou	japonica
CH-97	KSR	Mo mi	Guizhou	indica
CH-98	KSR	Wu mi han he	Guizhou	japonica
CH-99	KSR	Chang li bai guang mi	Guizhou	indica
CH-100	KSR	Wu li xiang	Guizhou	japonica
CH-101	KSR	Huang mao rong he	Guizhou	japonica
CH-102	KSR	Hei nuo	Guizhou	japonica
CH-103	KSR	Han nuo	Guizhou	japonica
CH-104	KSR	Ping qiu ma zhan	Guizhou	indica
CH-105	KSR	Xi ke nuo	Guizhou	indica
CH-106	KSR	Ping qiu xi mao nuo	Guizhou	japonica
CH-107	KSR	Ma ba xiang	Guizhou	indica
CH-108	KSR	Bai sha nuo	Guizhou	japonica
CH-109	KSR	Xi yin jing	Guizhou	japonica
CH-110	KSR	Zao he	Guizhou	japonica
CH-111	KSR	Huang shan xue	Guizhou	japonica
CH-112	KSR	Niu mang he	Guizhou	japonica
CH-113	KSR	Rong zhu he	Guizhou	japonica
CH-114	KSR	Gui yang he	Guizhou	japonica
CH-115	KSR	Dong sui he	Guizhou	japonica
CH-116	KSR	Lao lie zhu he	Guizhou	japonica
CH-117	KSR	Qi shi tian he	Guizhou	japonica
CH-118	KSR	Huang gang yang nong	Guizhou	japonica
CH-119	KSR	Bian long tu nuo	Guizhou	japonica
CH-120	KSR	Hei mang he	Guizhou	japonica
CH-121	KSR	Niu mao he	Guizhou	japonica
CH-122	KSR	Zhao xing hong mang bai nuo	Guizhou	japonica
CH-123	KSR	Zhao xing chang mang da nuo	Guizhou	japonica
CH-124	KSR	Zhao xing you mang da nuo	Guizhou	japonica
CH-125	KSR	Zhao xing hong pi bai nuo	Guizhou	japonica
CH-126	KSR	Zhao xing wu mang da nuo	Guizhou	japonica
CH-127	KSR	De shun ba yue he	Guizhou	japonica
CH-128	KSR	De shun nuo he	Guizhou	japonica
CH-129	KSR	Zhong bai he	Guizhou	japonica
CH-130	KSR	Da bai he	Guizhou	japonica
CH-131	KSR	Ji deng hong he	Guizhou	japonica
CH-132	KSR	Shui niu mao	Guizhou	japonica
CH-133	KSR	Wu mao he	Guizhou	japonica
CH-134	KSR	Gao yang hong mi	Guizhou	indica
CH-135	KSR	Rong jiang xiang he	Guizhou	japonica
CH-136	KSR	Nuo he	Guizhou	japonica
CH-137	KSR	Nuo mi gu	Guizhou	japonica
CH-138	KSR	Xiang nuo	Guizhou	japonica
CH-139	KSR	Da gu nuo	Guizhou	japonica
CH-140	KSR	Da nuo 1	Guizhou	japonica
CH-141	KSR	Tian he	Guizhou	japonica
CH-142	KSR	Han he 1	Guizhou	japonica
CH-143	KSR	Han he 2	Guizhou	japonica
CH-144	KSR	Jia bang xiang he	Guizhou	japonica
CH-145	KSR	Hei he	Guizhou	japonica
CH-146	KSR	Nuo he 1	Guizhou	japonica
CH-147	KSR	Huang ke nuo he	Guizhou	japonica
CH-148	KSR	Hei mang nuo he	Guizhou	japonica
CH-149	KSR	Xiang he nuo	Guizhou	japonica
CH-150	KSR	Xiang he 1	Guizhou	japonica
CH-151	KSR	Xiang he 2	Guizhou	japonica
CH-152	KSR	130 days he	Guizhou	japonica
CH-153	KSR	Nuo he 2	Guizhou	japonica
CH-154	KSR	Gou cen gao	Guizhou	japonica
CH-155	KSR	Xiang he nuo 1	Guizhou	japonica
CH-156	KSR	Nuo he 3	Guizhou	japonica
CH-157	KSR	Xiang he nuo 2	Guizhou	japonica
CH-158	KSR	Hei xiang he	Guizhou	japonica
CH-159	KSR	Nuo he 4	Guizhou	japonica
CH-160	KSR	Hei xiang he 1	Guizhou	japonica
CH-161	KSR	Nuo he 5	Guizhou	japonica
CH-162	KSR	120 days he	Guizhou	japonica
CH-163	KSR	Gou yang dang	Guizhou	japonica
CH-164	KSR	Xiang he 3	Guizhou	japonica
CH-165	KSR	Xiang he 4	Guizhou	japonica
CH-166	KSR	Xiang he 5	Guizhou	japonica
CH-167	KSR	Gou da ha	Guizhou	japonica
CH-168	KSR	Nuo he 6	Guizhou	japonica
CH-169	KSR	Nuo he 7	Guizhou	japonica
CH-170	KSR	Nuo he 8	Guizhou	japonica
CH-171	KSR	Nuo he 9	Guizhou	japonica
CH-172	KSR	Hei nuo 1	Guizhou	japonica
CH-173	KSR	Gou lie zhu	Guizhou	japonica
CH-174	KSR	Xiang mi	Guizhou	japonica
CH-175	KSR	Gong geng he	Guizhou	japonica
CH-176	KSR	Rong tang he	Guizhou	japonica
CH-177	KSR	Rong dong he	Guizhou	japonica
CH-178	KSR	Wu ming he 1	Guizhou	japonica
CH-179	KSR	Tong he	Guizhou	japonica
CH-180	KSR	Hei he 1	Guizhou	japonica
CH-181	KSR	60 days he	Guizhou	japonica
CH-182	KSR	Gong geng bian yi	Guizhou	japonica
CH-183	KSR	Gou zhai ge	Guizhou	japonica
CH-184	KSR	Ou gen	Guizhou	japonica
CH-185	KSR	Yang wen na	Guizhou	japonica
CH-186	KSR	Li jiu he	Guizhou	japonica
CH-187	KSR	Da bao he	Guizhou	japonica
CH-188	KSR	Yang wan	Guizhou	japonica
CH-189	KSR	Gou ha gong niu	Guizhou	japonica
CH-190	KSR	Ou tang	Guizhou	japonica
CH-191	KSR	Xiao huang bian yi	Guizhou	japonica
CH-192	KSR	Gou bing man	Guizhou	japonica
CH-193	KSR	Shan shu pi	Guizhou	japonica
CH-194	KSR	Hei he 2	Guizhou	japonica
CH-195	KSR	Hong he	Guizhou	japonica
CH-196	KSR	Gao gan he	Guizhou	japonica
CH-197	KSR	Ai gan he	Guizhou	indica
CH-198	KSR	Nuo he 10	Guizhou	japonica
CH-199	KSR	Nuo he 11	Guizhou	japonica
CH-200	KSR	Nuo he 12	Guizhou	japonica
CH-201	KSR	Nuo he 13	Guizhou	japonica
CH-202	KSR	Nuo he 14	Guizhou	japonica
CH-203	KSR	Huang mao he	Guizhou	japonica
CH-204	KSR	Qi yue gu	Guizhou	indica
CH-205	KSR	Xiu ni gu	Guizhou	indica
CH-206	KSR	Da hong jiao	Guizhou	indica
CH-207	KSR	Bai mi ma gu	Guizhou	indica
CH-208	KSR	Xi li you zhan	Guizhou	indica
CH-209	KSR	San ke cun	Guizhou	indica
CH-210	KSR	Bai mi ma nuo	Guizhou	japonica
CH-211	KSR	Tong he 1	Guizhou	japonica
CH-212	KSR	Guang tou he	Guizhou	japonica
CH-213	KSR	Rong dan he	Guizhou	japonica
CH-214	KSR	Hei he 3	Guizhou	japonica
CH-215	KSR	Gou dao	Guizhou	indica
CH-216	KSR	Ou liang	Guizhou	japonica
CH-217	KSR	Bai ke nuo	Guizhou	japonica
CH-218	KSR	Zao gu zi	Guizhou	indica
CH-219	KSR	Xiao nuo	Guizhou	indica
CH-220	KSR	Zao nuo gu	Guizhou	japonica
CH-221	KSR	Bo wang nuo	Guizhou	japonica
CH-222	KSR	Gan tian nuo 1	Guizhou	indica
CH-223	KSR	Wu ke nuo	Guizhou	japonica
CH-224	KSR	Da long zhan	Guizhou	indica
CH-225	KSR	Da hong gu	Guizhou	indica
CH-226	KSR	Mao zhan	Guizhou	indica
CH-227	KSR	Dong nuo	Guizhou	japonica
CH-228	KSR	Ba yue he 1	Guizhou	japonica
CH-229	KSR	Bai nuo gu	Guizhou	indica
CH-230	KSR	Ai nuo	Guizhou	indica
CH-231	KSR	Yin shan nuo	Guizhou	indica
CH-232	KSR	Hong mang he	Guizhou	japonica
CH-233	KSR	Rong he 1	Guizhou	japonica
CH-234	KSR	Han gu	Guizhou	japonica
CH-235	KSR	Hu xu nuo	Guizhou	japonica
CH-236	KSR	Ma wei zhan	Guizhou	indica
CH-237	KSR	Xu gu	Guizhou	indica
CH-238	KSR	Gai cao	Guizhou	indica
CH-239	KSR	Rong he 2	Guizhou	japonica
CH-240	KSR	Da bao he 1	Guizhou	japonica
CH-241	KSR	Dong dui	Guizhou	japonica
CH-242	KSR	Liang liang	Guizhou	japonica
CH-243	KSR	Zhan li nuo he 1	Guizhou	japonica
CH-244	KSR	Bian man	Guizhou	japonica
CH-245	KSR	Gan yuan	Guizhou	japonica
CH-246	KSR	Gou dong 1	Guizhou	japonica
CH-247	KSR	Zhan li nuo he 2	Guizhou	japonica
CH-248	KSR	Rong lan	Guizhou	japonica
CH-249	KSR	Gong gu	Guizhou	japonica
CH-250	KSR	Gou nen	Guizhou	japonica
CH-251	KSR	Ba ba gong he	Guizhou	japonica
CH-252	KSR	Ba ba mu he	Guizhou	japonica
CH-253	KSR	Da nian he	Guizhou	japonica
CH-254	KSR	Jiu yue jiu	Guizhou	japonica
CH-255	KSR	Gou ha dang	Guizhou	japonica
CH-256	KSR	Gou gong	Guizhou	japonica
CH-257	KSR	Gou lie dai nian	Guizhou	japonica
CH-258	KSR	Gou rong tun	Guizhou	japonica
CH-259	KSR	Gou gao qian	Guizhou	japonica
CH-260	KSR	Gou bai san	Guizhou	japonica
CH-261	KSR	Gou huang gang 1	Guizhou	japonica
CH-262	KSR	Gou cen gao ka	Guizhou	japonica
CH-263	KSR	Gou lie jiu-zao	Guizhou	japonica
CH-264	KSR	Gou lie jiu-wan	Guizhou	japonica
CH-265	KSR	Gou nong	Guizhou	japonica
CH-266	KSR	Gou dong 2	Guizhou	japonica
CH-267	KSR	Gou yue	Guizhou	japonica
CH-268	KSR	Gou dai	Guizhou	japonica
CH-269	KSR	Gou dai huo	Guizhou	japonica
CH-270	KSR	Gou dong	Guizhou	japonica
CH-271	KSR	Gou dong-hong mi	Guizhou	japonica
CH-272	KSR	Gou dai nian	Guizhou	japonica
CH-273	KSR	Da rong nuo	Guizhou	japonica
CH-274	KSR	Gou yong mi	Guizhou	japonica
CH-275	KSR	Gou yong wai	Guizhou	japonica
CH-276	KSR	Ding dong hei he	Guizhou	indica
CH-277	KSR	Gou dai nian 1	Guizhou	japonica
CH-278	KSR	Gou dang	Guizhou	japonica
CH-279	KSR	Xiang gu	Guizhou	indica
CH-280	KSR	Biao gei	Guizhou	japonica
CH-281	KSR	Biao dang	Guizhou	japonica
CH-282	KSR	Biao niu	Guizhou	japonica
CH-283	KSR	Biao bu	Guizhou	japonica
CH-284	KSR	Dong biao	Guizhou	japonica
CH-285	KSR	Dai nian ya	Guizhou	japonica
CH-286	KSR	Gou dai an - hua ke	Guizhou	japonica
CH-287	KSR	Gou dai an- bai ke	Guizhou	japonica
CH-288	KSR	Hei ke he	Guizhou	japonica
CH-289	KSR	Gou dang 1	Guizhou	japonica
CH-290	KSR	Gou nong 1	Guizhou	japonica
CH-291	KSR	Hou yang hao gun	Guizhou	japonica
CH-292	KSR	Gou dai an - you mang	Guizhou	japonica
CH-293	KSR	Gou dai an - wu mang	Guizhou	japonica
CH-294	KSR	Ye he	Guizhou	japonica
CH-295	KSR	De wu he	Guizhou	japonica
CH-296	KSR	Shu dong he	Guizhou	japonica
CH-297	KSR	Yang po he	Guizhou	japonica
CH-298	KSR	Gao jing he	Guizhou	japonica
CH-299	KSR	Hong he 2	Guizhou	japonica
CH-300	KSR	Lie zhu he	Guizhou	japonica
CH-301	KSR	Yang dang he	Guizhou	japonica
CH-302	KSR	Rong dong he 1	Guizhou	japonica
CH-303	KSR	Hei pi he	Guizhou	japonica
CH-304	KSR	90 days he	Guizhou	japonica
CH-305	KSR	Wang ni	Guizhou	japonica
CH-306	KSR	Yan san se	Guizhou	japonica
CH-307	KSR	Huang chuan	Guizhou	japonica
CH-308	KSR	Ba zhou hong he	Guizhou	japonica
CH-309	KSR	Gou tun	Guizhou	japonica
CH-310	KSR	Tu mang he	Guizhou	japonica
CH-311	KSR	Xiu shui he	Guizhou	japonica
CH-312	KSR	Ba zhou hei he	Guizhou	japonica
CH-313	KSR	Di ping hei he	Guizhou	japonica
CH-314	KSR	Bai xian he	Guizhou	japonica
CH-315	KSR	Keng dong hong he	Guizhou	japonica
CH-316	GZ	Zhuan zi nuo	Guizhou	japonica
CH-317	GZ	Dan zhan nuo	Guizhou	japonica
CH-318	GZ	Cun gu nuo	Guizhou	indica
CH-319	GZ	Da han gu 2	Guizhou	indica
CH-320	GZ	Da bai han gu	Guizhou	indica
CH-321	GZ	Mao gu	Guizhou	indica
CH-322	GZ	Hua jie nuo 1	Guizhou	japonica
CH-323	GZ	Xiao hong nuo	Guizhou	japonica
CH-324	GZ	Han dao bai nuo	Guizhou	indica
CH-325	GZ	Hei ke jing	Guizhou	japonica
CH-326	GZ	Huang ke nuo	Guizhou	indica
CH-327	GZ	Wu zui hong mao dao	Guizhou	japonica
CH-328	GZ	Xiang hong nuo	Guizhou	japonica
CH-329	GZ	Fei feng nuo	Guizhou	indica
CH-330	GZ	Han wan gu	Guizhou	japonica
CH-331	GZ	Han mao dao	Guizhou	japonica
CH-332	GZ	Han hei gu	Guizhou	indica
CH-333	GZ	Fei dong nuo	Guizhou	indica
CH-334	GZ	Da han gu 1	Guizhou	indica
CH-335	GZ	Ban bian nuo	Guizhou	japonica
CH-336	GZ	Guang tou nuo	Guizhou	japonica
CH-337	GZ	Fei dong nuo 1	Guizhou	indica
CH-338	GZ	Hao hao dong	Guizhou	indica
CH-339	GZ	Hao cu nuo	Guizhou	indica
CH-340	GZ	Hao xian na	Guizhou	japonica
CH-341	GZ	Er fen zhan	Guizhou	indica
CH-342	GZ	Han zhan	Guizhou	indica
CH-343	GZ	Han gu 1	Guizhou	japonica
CH-344	GZ	Han xiang nuo	Guizhou	japonica
CH-345	GZ	Hua nuo	Guizhou	japonica
CH-346	GZ	Han gu 2	Guizhou	indica
CH-347	GZ	Gao shan zao gu	Guizhou	indica
CH-348	GZ	Da ma nuo	Guizhou	japonica
CH-349	GZ	Han zhan gu 2	Guizhou	indica
CH-350	GZ	Bei zi nuo	Guizhou	japonica
CH-351	GZ	Ma xian nuo	Guizhou	indica
CH-352	GZ	Qian jin nuo	Guizhou	japonica
CH-353	GZ	Ma sang nuo	Guizhou	indica
CH-354	GZ	Bai yang nuo	Guizhou	indica
CH-355	GZ	Han nuo mi	Guizhou	japonica
CH-356	GZ	Xu xu wan gu	Guizhou	japonica
CH-357	GZ	Da xiang nuo	Guizhou	japonica
CH-358	GZ	Huang ke nuo 1	Guizhou	indica
CH-359	GZ	Ai nuo	Guizhou	indica
CH-360	GZ	Hua bian mao dao	Guizhou	japonica
CH-361	GZ	E dan nuo	Guizhou	japonica
CH-362	GZ	You nuo	Guizhou	japonica
CH-363	GZ	Hong ge da	Guizhou	japonica
CH-364	GZ	Da dong nuo	Guizhou	indica
CH-365	GZ	Leng shui qing gan	Guizhou	japonica
CH-366	GZ	Gao gan nuo	Guizhou	japonica
CH-367	GZ	Da hong wan gu	Guizhou	japonica
CH-368	GZ	Bai zhan nuo	Guizhou	japonica
CH-369	GZ	Yang mao nuo	Guizhou	japonica
CH-370	GZ	Zhan nuo	Guizhou	japonica
CH-371	GZ	Ai zi nuo	Guizhou	indica
CH-372	GZ	Ba bai li nuo	Guizhou	japonica
CH-373	GZ	Huang xiang nuo	Guizhou	japonica
CH-374	GZ	Gan tian nuo 2	Guizhou	indica
CH-375	GZ	Ban bian nuo	Guizhou	indica
CH-376	GZ	Chi mei zhan	Guizhou	indica
CH-377	GZ	Da guang zhan	Guizhou	indica
CH-378	GZ	Leng shui hong	Guizhou	indica
CH-379	GZ	Yi zhu miao	Guizhou	indica
CH-380	GZ	Da wan gu	Guizhou	japonica
CH-381	GZ	Guang tou wan mi	Guizhou	japonica
CH-382	GZ	Leng shui hong	Guizhou	japonica
CH-383	GZ	Han dao 1	Guizhou	indica
CH-384	GZ	Gao gan nuo 1	Guizhou	japonica
CH-385	GZ	Zhan ke nuo	Guizhou	indica
CH-386	GZ	Feng zi nuo	Guizhou	japonica
CH-387	GZ	Da bai gu 1	Guizhou	indica
CH-388	GZ	Hong ke ze nuo 1	Guizhou	japonica
CH-389	GZ	Hong ke ze nuo 2	Guizhou	japonica
CH-390	GZ	Hei ke che nuo 1	Guizhou	japonica
CH-391	GZ	Xiao hong mi	Guizhou	indica
CH-392	GZ	Tian wen nuo	Guizhou	japonica
CH-393	GZ	Bai yang nuo 1	Guizhou	japonica
CH-394	GZ	You mang da jian bai ke wan mi	Guizhou	japonica
CH-395	GZ	Can gu 1	Guizhou	indica
CH-396	GZ	Gao gan nuo 2	Guizhou	japonica
CH-397	GZ	Gao gan nuo 3	Guizhou	indica
CH-398	GZ	Huang ke nuo 2	Guizhou	japonica
CH-399	GZ	Huang si nuo 1	Guizhou	japonica
CH-400	GZ	Ai gan nuo	Guizhou	japonica
CH-401	GZ	Ban bian nuo 3	Guizhou	indica
CH-402	GZ	Da ma zhan	Guizhou	indica
CH-403	GZ	Yang mao nuo 1	Guizhou	japonica
CH-404	GZ	Gao gan bai ke nuo	Guizhou	japonica
CH-405	GZ	Ma ke zhe nuo	Guizhou	japonica
CH-406	GZ	Qing gan zhan	Guizhou	indica
CH-407	GZ	Zhan ke nuo 2	Guizhou	japonica
CH-408	GZ	Hei pi nuo	Guizhou	japonica
CH-409	GZ	Hei zhe nuo	Guizhou	japonica
CH-410	GZ	Han gu nuo	Guizhou	indica
CH-411	GZ	Gao gan nuo 4	Guizhou	indica
CH-412	GZ	Ma que gu	Guizhou	indica
CH-413	GZ	Mei gu	Guizhou	indica
CH-414	GZ	Yun gu nuo	Guizhou	indica
CH-415	GZ	Bai ke da nuo mi	Guizhou	indica
CH-416	GZ	Jia dong gu	Guizhou	japonica
CH-417	GZ	Ji xue nuo	Guizhou	japonica
CH-418	GZ	Ma yi nuo	Guizhou	japonica
CH-419	GZ	Niu wei tuo	Guizhou	indica
CH-420	GZ	Liu zhi wan mi	Guizhou	japonica
CH-421	GZ	Bai jiao ma gu	Guizhou	indica
CH-422	GZ	Ban bian nuo	Guizhou	japonica
CH-423	GZ	Bai ke yang mao	Guizhou	japonica
CH-424	GZ	Lao ya nuo	Guizhou	japonica
CH-425	GZ	Ji xue nuo 2	Guizhou	japonica
CH-426	GZ	Huang la nuo	Guizhou	indica
CH-427	GZ	Ma zhan nuo	Guizhou	indica
CH-428	GZ	Yang chang jin bao yin	Guizhou	indica
CH-429	GZ	Yun jin da nuo	Guizhou	japonica
CH-430	GZ	Ye ya zhe nuo	Guizhou	japonica
CH-431	GZ	Ma you zhan	Guizhou	indica
CH-432	GZ	Ge dou gu	Guizhou	indica
CH-433	GZ	Zhu niao gu	Guizhou	japonica
CH-434	GZ	Niu wei tuo	Guizhou	japonica
CH-435	GZ	Wan gu	Guizhou	indica
CH-436	GZ	Bai ke nuo 2	Guizhou	japonica
CH-437	GZ	Qian dan nuo	Guizhou	indica
CH-438	GZ	Han nuo 2	Guizhou	indica
CH-439	GZ	Hong ke wan gu	Guizhou	japonica
CH-440	GZ	Guang ke hong mi xian zhan	Guizhou	indica
CH-441	GZ	Huang ke jing zhan 4	Guizhou	japonica
CH-442	GZ	Chang mang jing zhan 1	Guizhou	japonica
CH-443	GZ	Fei dong nuo 2	Guizhou	indica
CH-444	GZ	Chun hong nuo	Guizhou	japonica
CH-445	GZ	Huang ke xian zhan	Guizhou	indica
CH-446	GZ	Hong mi xiao ma zhan	Guizhou	indica
CH-447	GZ	Hong ke jing	Guizhou	japonica
CH-448	GZ	Bai ke jing	Guizhou	japonica
CH-449	GZ	Hong wan jing 2	Guizhou	japonica
CH-450	GZ	Ying tao nuo	Guizhou	japonica
CH-451	GZ	Huang ke 籼nuo	Guizhou	indica
CH-452	GZ	Ma ke fei dong nuo	Guizhou	japonica
CH-453	GZ	Huang ke ying tao nuo	Guizhou	japonica
CH-454	GZ	Huang he nuo	Guizhou	japonica
CH-455	GZ	Hei mang huang nuo	Guizhou	japonica
CH-456	GZ	Hei yun nuo	Guizhou	japonica
CH-457	GZ	Hao sheng	Guizhou	japonica
CH-458	GZ	Bai ke wan mi	Guizhou	japonica
CH-459	GZ	Huang ke chang mi zhan	Guizhou	indica
CH-460	GZ	Huang ke gan dan zhan	Guizhou	indica
CH-461	GZ	Hong mi xiao ma zhan 1	Guizhou	indica
CH-462	GZ	Han xiang gu	Guizhou	japonica
CH-463	GZ	Huang ke wei mang jing zhan	Guizhou	japonica
CH-464	GZ	Guang ke hong mi jing zhan	Guizhou	japonica
CH-465	GZ	Hong mi jing zhan 1	Guizhou	japonica
CH-466	GZ	Huang ke jing zhan 6	Guizhou	japonica
CH-467	GZ	Chang mang jing zhan 2	Guizhou	japonica
CH-468	GZ	Chang mang jing zhan 5	Guizhou	japonica
CH-469	GZ	Bi you han jing 2	Guizhou	japonica
CH-470	GZ	Bi you jing zhan 4	Guizhou	japonica
CH-471	GZ	Bi you jing zhan 5	Guizhou	japonica
CH-472	GZ	Yuan jing zhan	Guizhou	japonica
CH-473	GZ	Zi mang jing	Guizhou	japonica
CH-474	GZ	Dan ke jing zhan	Guizhou	japonica
CH-475	GZ	He hua ke cao guo nuo	Guizhou	japonica
CH-476	GZ	He huang hua ke nuo	Guizhou	japonica
CH-477	GZ	Hong ke nuo 1	Guizhou	japonica
CH-478	GZ	Hong hua ke nuo 2	Guizhou	japonica
CH-479	GZ	Hong ke nuo 2	Guizhou	japonica
CH-480	GZ	Hong cao guo nuo	Guizhou	japonica
CH-481	GZ	Bai ke shan gu	Guizhou	indica
CH-482	GZ	Hong ke nuo	Guizhou	japonica
CH-483	GZ	Huang ke han nuo	Guizhou	japonica
CH-484	GZ	Bai yang nuo 2	Guizhou	indica
CH-485	GZ	Gao nuo	Guizhou	indica
CH-486	GZ	Hong ke shan gu	Guizhou	indica
CH-487	GZ	Han zhan gu	Guizhou	indica
CH-488	GZ	Bai ke shan gu	Guizhou	japonica
CH-489	GZ	Zao nuo	Guizhou	indica
CH-490	GZ	Da hong gu 2	Guizhou	japonica
CH-491	GZ	Yan zhan	Guizhou	indica
CH-492	GZ	Dong ban nuo	Guizhou	japonica
CH-493	GZ	Lao huang nuo	Guizhou	japonica
CH-494	GZ	Ying tao nuo 1	Guizhou	japonica
CH-495	GZ	Cun nuo	Guizhou	indica
CH-496	GZ	Huang na nuo	Guizhou	japonica
CH-497	GZ	Long yang nuo	Guizhou	indica
CH-498	GZ	Han he	Guizhou	indica
CH-499	GZ	Ai jiao nuo 7	Guizhou	indica
CH-500	GZ	Hei ke nuo 1	Guizhou	indica
CH-501	GZ	Hong zhe nuo	Guizhou	japonica
CH-502	GZ	Huang si nuo 4	Guizhou	japonica
CH-503	GZ	Bai ke zhe nuo 2	Guizhou	indica
CH-504	GZ	Han fan gu	Guizhou	indica
CH-505	GZ	Han dao	Guizhou	japonica
CH-506	GZ	Tuan huang zhan	Guizhou	indica
CH-507	GZ	Zao nuo	Guizhou	indica
CH-508	GZ	Yun gu nuo 2	Guizhou	indica
CH-509	GZ	Nong yang nuo	Guizhou	indica
CH-510	GZ	Bai ke da nuo	Guizhou	japonica
CH-511	GZ	Han gu 3	Guizhou	japonica
CH-512	GZ	Hong gan mi	Guizhou	indica
CH-513	GZ	Hong han dao	Guizhou	japonica
CH-514	GZ	Jiu yue nuo gu	Guizhou	japonica
CH-515	GZ	Yang ke nuo	Guizhou	indica
CH-516	GZ	Zhan gu nuo	Guizhou	indica
CH-517	GZ	Duan mang he	Guizhou	indica
CH-518	GZ	Ding mang jiao bian nuo	Guizhou	japonica
CH-519	GZ	Hei mi nuo	Guizhou	indica
CH-520	GZ	Pi gu zhan	Guizhou	indica
CH-521	GZ	Wu mao han dao	Guizhou	indica
CH-522	GZ	Zi han nuo	Guizhou	japonica
CH-523	GZ	Bai nuo gu	Guizhou	japonica
CH-524	GZ	Huang ma hong zhan	Guizhou	indica
CH-525	GZ	Ma zhan gu	Guizhou	indica
CH-526	GZ	Hei mang zhan	Guizhou	indica
CH-527	GZ	Ma ke zhan 2	Guizhou	indica
CH-528	GZ	Hei yun zhan	Guizhou	japonica
CH-529	GZ	Hao guo	Guizhou	indica
CH-530	GZ	Huang ke zhan	Guizhou	indica
CH-531	GZ	Bai jing zhan	Guizhou	japonica
CH-532	GZ	Zi mang bai mi jing zhan	Guizhou	japonica
CH-533	GZ	Duan hei mang dao	Guizhou	japonica
CH-534	GZ	Han jing 6	Guizhou	japonica
CH-535	GZ	Bai ke jing	Guizhou	japonica
CH-536	GZ	Huang ke han jing 3	Guizhou	japonica
CH-537	GZ	Fei dong nuo 3	Guizhou	indica
CH-538	GZ	Hua ke nuo	Guizhou	japonica
CH-539	GZ	Hong ke nuo 3	Guizhou	japonica
CH-540	GZ	Gan huang zi ying nuo	Guizhou	japonica
CH-541	GZ	Hong han nuo 1	Guizhou	japonica
CH-542	GZ	Hong han nuo 2	Guizhou	japonica
CH-543	GZ	Zhu fen nuo	Guizhou	japonica
CH-544	GZ	Han gu 4	Guizhou	japonica
CH-545	GZ	Xiao bai mi	Guizhou	indica
CH-546	GZ	Sheng li gu	Guizhou	indica
CH-547	GZ	Da bai gu	Guizhou	indica
CH-548	GZ	Han dao	Guizhou	japonica
CH-549	GZ	Da ye gu	Guizhou	indica
CH-550	GZ	Han dao	Guizhou	japonica
CH-551	GZ	Pan xian zhan	Guizhou	indica
CH-552	GZ	Hao cu nuo	Guizhou	japonica
CH-553	GZ	Hei ke nuo 2	Guizhou	japonica
CH-554	GZ	Ai nuo	Guizhou	indica
CH-555	GZ	Wa hui nuo	Guizhou	japonica
CH-556	GZ	Bai ke nuo 1	Guizhou	japonica
CH-557	GZ	Cun gu	Guizhou	japonica
CH-558	GZ	Da nuo gu	Guizhou	japonica
CH-559	GZ	Qi zhan	Guizhou	indica
CH-560	GZ	Yin du nuo	Guizhou	indica
CH-561	GZ	Han gu 5	Guizhou	japonica
CH-562	GZ	Ze gu	Guizhou	japonica
CH-563	GZ	Zhu niao nuo	Guizhou	japonica
CH-564	GZ	Ai zi nuo 1	Guizhou	japonica
CH-565	GZ	Si gu qi	Guizhou	indica
CH-566	GZ	Nan zao dao	Guizhou	indica
CH-567	GZ	Wu shao zhan	Guizhou	indica
CH-568	GZ	Hei qi lan	Guizhou	indica
CH-569	GZ	Er hong mi	Guizhou	indica
CH-570	GZ	Gao shan lei zhan	Guizhou	indica
CH-571	GZ	Chuan nuo	Guizhou	japonica
CH-572	GZ	Wu ming ai xian	Guizhou	indica
CH-573	GZ	Gu zi nuo	Guizhou	japonica
CH-574	GZ	Tie sha nuo	Guizhou	indica
CH-575	GZ	Zhan gu nuo	Guizhou	indica
CH-576	GZ	Wan nan dao	Guizhou	indica
CH-577	GZ	You zhan 1	Guizhou	indica
CH-578	GZ	Gai shui bai 2	Guizhou	indica
CH-579	GZ	Deng pao qi	Guizhou	indica
CH-580	GZ	Xiao huang nuo	Guizhou	japonica
CH-581	GZ	Luan jiao huang zhan	Guizhou	indica
CH-582	GZ	Shi yang gu	Guizhou	indica
CH-583	GZ	Hua di xiang gu	Guizhou	japonica
CH-584	GZ	Han nuo 3	Guizhou	indica
CH-585	GZ	Jin bao yin	Guizhou	indica
CH-586	GZ	Huang si nuo 3	Guizhou	indica
CH-587	GZ	Ma nuo	Guizhou	indica
CH-588	GZ	Mao han wan gu	Guizhou	indica
CH-589	GZ	Bai mao dao	Guizhou	japonica
CH-590	GZ	Xing ren hong mao dao	Guizhou	japonica
CH-591	GZ	Xing ren da hong wan gu	Guizhou	japonica
CH-592	GZ	Han gu 6	Guizhou	indica
CH-593	GZ	Leng shui zhan 2	Guizhou	japonica
CH-594	GZ	Qing gan nuo	Guizhou	japonica
CH-595	GZ	Huang han wan gu	Guizhou	indica
CH-596	GZ	Ai zi nuo 2	Guizhou	indica
CH-597	GZ	Xiao guang nuo	Guizhou	indica
CH-598	GZ	Hong ke nuo 4	Guizhou	japonica
CH-599	GZ	Ma gu nuo	Guizhou	japonica
CH-600	GZ	Xiao han gu	Guizhou	indica
CH-601	GZ	Bai ke ai nuo	Guizhou	japonica
CH-602	GZ	Bai wan gu	Guizhou	japonica
CH-603	GZ	Bai tian zao	Guizhou	indica
CH-604	GZ	Han nuo	Guizhou	indica
CH-605	GZ	Xiang nuo 1	Guizhou	japonica
CH-606	GZ	Xiao huang nuo	Guizhou	japonica
CH-607	GZ	Bai guo nuo 1	Guizhou	japonica
CH-608	GZ	Zao huang nuo	Guizhou	japonica
CH-609	GZ	Mao mao nuo	Guizhou	japonica
CH-610	GZ	Yang chen nuo	Guizhou	japonica
CH-611	GZ	He tao nuo	Guizhou	indica
CH-612	GZ	Hei gan nuo	Guizhou	indica
CH-613	GZ	Mao gu	Guizhou	japonica
CH-614	GZ	Hua ke nuo 1	Guizhou	japonica
CH-615	GZ	Nuo bai han gu	Guizhou	indica
CH-616	GZ	Da hong jiao zhan	Guizhou	indica
CH-617	GZ	Cun gu nuo 1	Guizhou	indica
CH-618	GZ	Cun gu nuo 3	Guizhou	indica
CH-619	GZ	Xiao gu nuo	Guizhou	indica
CH-620	GZ	Cun gu nuo 2	Guizhou	indica
CH-621	GZ	Wu mang gao nuo	Guizhou	japonica
CH-622	GZ	Da nuo 2	Guizhou	japonica
CH-623	GZ	Hao guang xun	Guizhou	indica
CH-624	GZ	Han gu 5	Guizhou	indica
CH-625	GZ	An shun hong gu	Guizhou	japonica
CH-626	GZ	Han fan gu	Guizhou	indica
CH-627	GZ	Han nuo gu	Guizhou	indica
CH-628	GZ	Han gu 6	Guizhou	japonica
CH-629	GZ	Huang ke nuo 3	Guizhou	japonica
CH-630	GZ	Bai yang nuo 3	Guizhou	japonica
CH-631	GZ	Zao nuo mi	Guizhou	japonica
CH-632	GZ	Yan zhi nuo	Guizhou	japonica
CH-633	GZ	Xiang ke nuo	Guizhou	indica
CH-634	GZ	Da bai ke nuo	Guizhou	indica
CH-635	GZ	Qi shi zao	Guizhou	indica
CH-636	GZ	Zhu ya zhan	Guizhou	indica
CH-637	GZ	Zhan ke nuo 1	Guizhou	indica
CH-638	GZ	Zhan ke nuo 3	Guizhou	japonica
CH-639	GZ	Huang ke nuo 4	Guizhou	indica
CH-640	GZ	Gao shan leng shui hong mao	Guizhou	japonica
CH-641	GZ	Xiao huang nuo	Guizhou	japonica
CH-642	GZ	500 li	Guizhou	indica
CH-643	GZ	Da fang yang mao gu	Guizhou	japonica
CH-644	GZ	Ma huang gu	Guizhou	indica
CH-645	GZ	Hei jie gu	Guizhou	indica
CH-646	GZ	Zha kou nuo	Guizhou	japonica
CH-647	GZ	Huo san gu	Guizhou	indica
CH-648	GZ	Zao bai gu 1	Guizhou	indica
CH-649	GZ	Luo fu zao	Guizhou	indica
CH-650	GZ	Luo fu zao 1	Guizhou	indica
CH-651	GZ	Xiao hei gu	Guizhou	japonica
CH-652	GZ	Xiao hua zhan	Guizhou	indica
CH-653	GZ	Yi gen zhan	Guizhou	indica
CH-654	GZ	Tuan gu 2	Guizhou	indica
CH-655	GZ	Wan li xian	Guizhou	indica
CH-656	GZ	Hong jiao zhan	Guizhou	indica
CH-657	GZ	San ke cun 1	Guizhou	indica
CH-658	GZ	Bang tou ma	Guizhou	indica
CH-659	GZ	Ai zi nuo 3	Guizhou	japonica
CH-660	GZ	Ma wei zhan 2	Guizhou	indica
CH-661	GZ	Chang mao nuo	Guizhou	japonica
CH-662	GZ	Leng shui nuo 1	Guizhou	indica
CH-663	GZ	Ma wei zhan 1	Guizhou	indica
CH-664	GZ	Xiao bei nuo	Guizhou	japonica
CH-665	GZ	Xi yan zhan 1	Guizhou	indica
CH-666	GZ	Ji ka nuo	Guizhou	japonica
CH-667	GZ	Ma zhan 1	Guizhou	indica
CH-668	GZ	Zhe nuo	Guizhou	japonica
CH-669	GZ	Huang la nuo 1	Guizhou	japonica
CH-670	GZ	Ban bian nuo	Guizhou	indica
CH-671	GZ	Meng guan da ma gu	Guizhou	indica
CH-672	GZ	Xiao he zao	Guizhou	indica
CH-673	GZ	Hong gu	Guizhou	japonica
CH-674	GZ	Zhu niao nuo 1	Guizhou	japonica
CH-675	GZ	Huang jin nuo 2	Guizhou	japonica
CH-676	GZ	Wu jiu gu	Guizhou	japonica
CH-677	GZ	Gan zi gu	Guizhou	japonica
CH-678	GZ	Qi shi zao	Guizhou	indica
CH-679	GZ	Huang si nuo 2	Guizhou	japonica
CH-680	GZ	Feng gang gu	Guizhou	indica
CH-681	GZ	San bai bang	Guizhou	indica
CH-682	GZ	Bai yang nuo 4	Guizhou	japonica
CH-683	GZ	Yong chuan nuo	Guizhou	indica
CH-684	GZ	Ma ma nuo	Guizhou	indica
CH-685	GZ	Gao gan nuo 5	Guizhou	indica
CH-686	GZ	Cun gu nuo 4	Guizhou	indica
CH-687	GZ	Ban nian huang	Guizhou	japonica
CH-688	GZ	Bhi yue qing	Guizhou	japonica
CH-689	GZ	Yang ma gu	Guizhou	indica
CH-690	GZ	Da bai gu 1	Guizhou	indica
CH-691	GZ	Mao mao gu	Guizhou	indica
CH-692	GZ	Ying tao nuo 2	Guizhou	japonica
CH-693	GZ	Zao ma gu	Guizhou	japonica
CH-694	GZ	Ziao ma gu 2	Guizhou	indica
CH-695	GZ	Xiang ke nuo	Guizhou	indica
CH-696	GZ	Huang zhan	Guizhou	indica
CH-697	GZ	Da bai zao gu	Guizhou	indica
CH-698	GZ	Da ma gu	Guizhou	indica
CH-699	GZ	Pi gu zhan	Guizhou	indica
CH-700	GZ	Bai mi zhan	Guizhou	indica
CH-701	GZ	Huang nuo 1	Guizhou	japonica
CH-702	GZ	Bai ke nuo 3	Guizhou	indica
CH-703	GZ	Da huang nuo	Guizhou	japonica
CH-704	GZ	Huang nuo	Guizhou	japonica
CH-705	GZ	Hei ma zhan 2	Guizhou	indica
CH-706	GZ	Xiang ke dao	Guizhou	japonica
CH-707	GZ	Hao sheng xue	Guizhou	japonica
CH-708	GZ	Pang gu 2	Guizhou	indica
CH-709	GZ	Huang ke xian zhan 2	Guizhou	indica
CH-710	GZ	Xiao bai ke xian zhan	Guizhou	indica
CH-711	GZ	Zong mang hong mi zhan	Guizhou	indica
CH-712	GZ	Chang li jing zhan	Guizhou	japonica
CH-713	GZ	Fei dong nuo 4	Guizhou	indica
CH-714	GZ	Hei he nuo	Guizhou	japonica
CH-715	GZ	Suo mi cao	Guizhou	indica
CH-716	GZ	Xiao hong mi xian zhan	Guizhou	indica
CH-717	GZ	Xiao guang ke xian zhan	Guizhou	indica
CH-718	GZ	Bai mi zhan	Guizhou	indica
CH-719	GZ	Jing dao	Guizhou	japonica
CH-720	GZ	Hong wan jing 1	Guizhou	japonica
CH-721	GZ	Han zhe gu	Guizhou	japonica
CH-722	GZ	Dan ke nuo	Guizhou	japonica
CH-723	GZ	Bai zhi nuo	Guizhou	japonica
CH-724	GZ	Su zi nuo	Guizhou	japonica
CH-725	GZ	Xiao huang ke xian nuo	Guizhou	indica
CH-726	GZ	Hei ke ying tao nuo 2	Guizhou	japonica
CH-727	GZ	Hong he nuo 1	Guizhou	japonica
CH-728	GZ	Hong he nuo 2	Guizhou	japonica
CH-729	GZ	Zi hua ke	Guizhou	japonica
CH-730	GZ	Hei han gu 2	Guizhou	japonica
CH-731	GZ	Xiao huang ke xian zhan 2	Guizhou	indica
CH-732	GZ	Xiao bai mi 籼zhan 1	Guizhou	indica
CH-733	GZ	Han zhan gu	Guizhou	indica
CH-734	GZ	Huang ke dong zhan	Guizhou	indica
CH-735	GZ	Dong mang huang ke jing	Guizhou	japonica
CH-736	GZ	Huang ke hei mang jing	Guizhou	japonica
CH-737	GZ	Hao suan jing 1	Guizhou	japonica
CH-738	GZ	Zi huang ke jing	Guizhou	japonica
CH-739	GZ	Xiao hei hua ke jing	Guizhou	japonica
CH-740	GZ	Huang hua ke nuo	Guizhou	japonica
CH-741	GZ	Huang ke jing nuo 1	Guizhou	japonica
CH-742	GZ	Huang ke xian nuo	Guizhou	indica
CH-743	GZ	Guang ke xian nuo 1	Guizhou	japonica
CH-744	GZ	Ma ke hong mang jing nuo	Guizhou	japonica
CH-745	GZ	Huang ke jing nuo 5	Guizhou	japonica
CH-746	GZ	Fei dong nuo 5	Guizhou	indica
CH-747	GZ	Fei dong nuo 6	Guizhou	indica
CH-748	GZ	Han ta nuo 1	Guizhou	indica
CH-749	GZ	Han ta nuo 2	Guizhou	indica
CH-750	GZ	Huang cao guo nuo	Guizhou	japonica
CH-751	GZ	Huang yun nuo	Guizhou	japonica
CH-752	GZ	Huang wu ju nuo	Guizhou	japonica
CH-753	GZ	Hei ma nuo	Guizhou	japonica
CH-754	GZ	Ai nuo	Guizhou	japonica
CH-755	GZ	Leng shui zhan 2	Guizhou	indica
CH-756	GZ	Hong nuo	Guizhou	japonica
CH-757	GZ	Hong ke han nuo	Guizhou	indica
CH-758	GZ	Di tou nuo	Guizhou	indica
CH-759	GZ	You zhan	Guizhou	japonica
CH-760	GZ	Zhu ya gu	Guizhou	indica
CH-761	GZ	Leng shui nuo 2	Guizhou	japonica
CH-762	GZ	Zhan ke nuo 4	Guizhou	indica
CH-763	GZ	Wu xiang nuo 2	Guizhou	japonica
CH-764	GZ	Leng shui zao	Guizhou	indica
CH-765	GZ	Qing gan zhan	Guizhou	indica
CH-766	GZ	Ban bian nuo 2	Guizhou	japonica
CH-767	GZ	Hong zhan gu	Guizhou	indica
CH-768	GZ	Fen nuo	Guizhou	indica
CH-769	GZ	Qian jin nuo 1	Guizhou	indica
CH-770	GZ	Gao shan ge da nuo	Guizhou	japonica
CH-771	GZ	Zhu sha nuo	Guizhou	japonica
CH-772	GZ	Zhan gu	Guizhou	indica
CH-773	GZ	Nuo gan zi	Guizhou	indica
CH-774	GZ	Da jiang xi gu	Guizhou	japonica
CH-775	GZ	Mi liang xian	Guizhou	japonica
CH-776	GZ	Liu shi zao	Guizhou	indica
CH-777	GZ	Huang ma gu	Guizhou	indica
CH-778	GZ	Bai ri zao 4	Guizhou	indica
CH-779	GZ	Mei tuo zhan	Guizhou	indica
CH-780	GZ	Xi fan zao 1	Guizhou	indica
CH-781	GZ	Sha zhan 1	Guizhou	indica
CH-782	GZ	Hong jiao zhan 1	Guizhou	indica
CH-783	GZ	Tuan yu ke	Guizhou	indica
CH-784	GZ	Yang yan zhan	Guizhou	indica
CH-785	GZ	Xin hua yao ai	Guizhou	indica
CH-786	GZ	Mei zhan 1	Guizhou	indica
CH-787	GZ	Chen xi zao	Guizhou	indica
CH-788	GZ	Hu guang zhan	Guizhou	indica
CH-789	GZ	Gan tian nuo 3	Guizhou	indica
CH-790	GZ	Tuan gu	Guizhou	indica
CH-791	GZ	Xiao nuo gu	Guizhou	indica
CH-792	GZ	Shi yang nuo	Guizhou	indica
CH-793	GZ	Wan zhan nuo	Guizhou	indica
CH-794	GZ	Mian tiao zhan	Guizhou	indica
CH-795	GZ	Cun gu nuo 5	Guizhou	indica
CH-796	GZ	Yang bai nuo	Guizhou	indica
CH-797	GZ	Ye xia cang	Guizhou	indica
CH-798	GZ	Wu jiao zhan	Guizhou	indica
CH-799	GZ	Cun gu nuo 6	Guizhou	indica
CH-800	GZ	Hong ke han he	Guizhou	japonica
CH-801	GZ	Bai ri gu	Guizhou	indica
CH-802	GZ	Yi bian dao	Guizhou	indica
CH-803	GZ	Pu tao gu	Guizhou	indica
CH-804	GZ	Hui hui nuo	Guizhou	japonica
CH-805	GZ	Wu li cun	Guizhou	indica
CH-806	GZ	Wan mi nuo	Guizhou	indica
CH-807	GZ	Mao nuo 2	Guizhou	indica
CH-808	GZ	Liang jun nuo	Guizhou	japonica
CH-809	GZ	Tuo tuo nuo 2	Guizhou	indica
CH-810	GZ	Zhan ke nuo 5	Guizhou	indica
CH-811	GZ	Zi ye yao nuo	Guizhou	indica
CH-812	GZ	Hei nuo mi 3	Guizhou	indica
CH-813	GZ	He ai hei nuo	Guizhou	japonica
CH-814	GZ	Bai bang hei nuo 1	Guizhou	japonica
CH-815	GZ	Zi gan zhan	Guizhou	indica
CH-816	GZ	Xiao hong mi 2	Guizhou	indica
CH-817	GZ	Leng shui hong	Guizhou	indica
CH-818	GZ	Hua ke nuo 2	Guizhou	japonica
CH-819	GZ	Mao yao nuo	Guizhou	japonica
CH-820	GZ	Yang mao nuo 2	Guizhou	indica
CH-821	GZ	Hei yao nuo	Guizhou	indica
CH-822	GZ	Han gu 6	Guizhou	indica
CH-823	GZ	Hong gan ye gai mi 1	Guizhou	indica
CH-824	GZ	Da bai zhan	Guizhou	indica
CH-825	GZ	Da hua hong mi	Guizhou	indica
CH-826	GZ	Ba bai li	Guizhou	indica
CH-827	GZ	Jiu yue qing 2	Guizhou	indica
CH-828	GZ	Da bai gu	Guizhou	indica
CH-829	GZ	Ji xue gu	Guizhou	indica
CH-830	GZ	Da zhong nuo	Guizhou	japonica
CH-831	GZ	Dong gan nuo	Guizhou	japonica
CH-832	GZ	Huang si nuo	Guizhou	japonica
CH-833	GZ	Han gu 7	Guizhou	japonica
CH-834	GZ	Huang la zhe nuo	Guizhou	indica
CH-835	GZ	Ban bian nuo 8	Guizhou	indica
CH-836	GZ	Jin ma gu	Guizhou	indica
CH-837	GZ	Hei mi	Guizhou	indica
CH-838	GZ	Tie ke gang gan	Guizhou	indica
CH-839	GZ	Bei zai mi	Guizhou	japonica
CH-840	GZ	San ke cun 2	Guizhou	indica
CH-841	GZ	Hei nuo mi 1	Guizhou	japonica
CH-842	GZ	Zao chi xiang	Guizhou	japonica
CH-843	GZ	Di shui gu	Guizhou	indica
CH-844	GZ	Ye zhu nuo	Guizhou	japonica
CH-845	GZ	Tian dong nuo	Guizhou	indica
CH-846	GZ	Bai jiao zhan	Guizhou	japonica
CH-847	GZ	Ji ka nuo	Guizhou	japonica
CH-848	GZ	Ye gu ai	Guizhou	indica
CH-849	GZ	Ma gu ai	Guizhou	indica
CH-850	GZ	He ke hong mi xian zhan	Guizhou	indica
CH-851	GZ	Da hao xian ji	Guizhou	indica
CH-852	GZ	Bai tian zao	Guizhou	indica
CH-853	GZ	Hong mi da li zhan	Guizhou	indica
CH-854	GZ	Hao ruo li	Guizhou	indica
CH-855	GZ	Da li nuo	Guizhou	japonica
CH-856	GZ	Ma zhan 3	Guizhou	indica
CH-857	GZ	He gan xian zhan	Guizhou	indica
CH-858	GZ	Duan mang xian zhan	Guizhou	indica
CH-859	GZ	Duan mang bai mi zhan	Guizhou	indica
CH-860	GZ	Zi he hong mi zhan	Guizhou	japonica
CH-861	GZ	Duan mang gan huang xian zhan	Guizhou	indica
CH-862	GZ	Gan huang bai mi zhan	Guizhou	indica
CH-863	GZ	Han jing 1	Guizhou	japonica
CH-864	GZ	Meng la zi sui gu	Guizhou	japonica
CH-865	GZ	Bi you han nuo	Guizhou	indica
CH-866	GZ	Yin hei nuo	Guizhou	japonica
CH-867	GZ	Han gu 8	Guizhou	japonica
CH-868	GZ	Wu han nuo	Guizhou	japonica
CH-869	GZ	Da huang ke nuo	Guizhou	japonica
CH-870	GZ	Dan ke nuo	Guizhou	japonica
CH-871	GZ	Hong ke nuo 5	Guizhou	japonica
CH-872	GZ	Hong ke nuo 6	Guizhou	japonica
CH-873	GZ	Hua ke nuo 1	Guizhou	japonica
CH-874	GZ	Hao lv guang zhan	Guizhou	japonica
CH-875	GZ	Shan gu	Guizhou	japonica
CH-876	GZ	Xiao bai mi 3	Guizhou	indica
CH-877	GZ	Han nuo 4	Guizhou	japonica
CH-878	GZ	Han gu 9	Guizhou	japonica
CH-879	GZ	Da ye gu	Guizhou	indica
CH-880	GZ	Han nuo 5	Guizhou	japonica
CH-881	GZ	Huang ke nuo 5	Guizhou	japonica
CH-882	GZ	Huang ke zhan	Guizhou	indica
CH-883	GZ	Yin nong nuo	Guizhou	indica
CH-884	GZ	Han nuo 6	Guizhou	japonica
CH-885	GZ	Han nuo 7	Guizhou	japonica
CH-886	GZ	Han gu 10	Guizhou	japonica
CH-887	GZ	Han gu 11	Guizhou	japonica
CH-888	GZ	Hua ke han gu	Guizhou	japonica
CH-889	GZ	Han dao	Guizhou	japonica
CH-890	GZ	Han wan gu	Guizhou	japonica
CH-891	GZ	Hai pu xiao hong zhan	Guizhou	indica
CH-892	GZ	Mu chong jing zhan	Guizhou	japonica
CH-893	GZ	Huang ke xian nuo	Guizhou	indica
CH-894	NP	Kui hua nuo	Jiangsu	japonica
CH-895	NP	Wu xiu nuo	Jiangsu	japonica
CH-896	NP	Ji jiao nuo	Jiangsu	japonica
CH-897	NP	Hang zhou nuo	Jiangsu	japonica
CH-898	NP	Xiang mang nuo	Jiangsu	japonica
CH-899	NP	Ya xue nuo	Jiangsu	japonica
CH-900	NP	Qiang dao nuo	Jiangsu	japonica
CH-901	NP	Hong mang nuo	Jiangsu	japonica
CH-902	NP	Da dong nuo	Zhejiang	japonica
CH-903	NP	Hong mao nuo	Zhejiang	japonica
CH-904	NP	Ni kuai chui	Zhejiang	japonica
CH-905	NP	Wu ju wan	Zhejiang	japonica
CH-906	NP	Wu zhu nuo	Zhejiang	japonica
CH-907	NP	Chang mao nuo 1	Zhejiang	japonica
CH-908	NP	Dang di nuo	Zhejiang	japonica
CH-909	NP	Wu tou nuo	Zhejiang	japonica
CH-910	NP	Da nuo 3	Zhejiang	japonica
CH-911	NP	Huang nuo	Zhejiang	japonica
CH-912	NP	Chi mang nuo	Zhejiang	japonica
CH-913	NP	Huang ban nuo	Zhejiang	japonica
CH-914	NP	Cao xie jin	Zhejiang	japonica
CH-915	NP	Hong ke nuo 7	Zhejiang	japonica
CH-916	NP	Ben di nuo dao	Zhejiang	japonica
CH-917	NP	Xiang nuo 2	Zhejiang	japonica
CH-918	NP	Wu ke dao	Zhejiang	japonica
CH-919	NP	Wu wan dao	Zhejiang	japonica
CH-920	NP	Gou nuo	Zhejiang	japonica
CH-921	NP	Zi jiang nuo	Zhejiang	japonica
CH-922	NP	Jiang hong nuo	Zhejiang	japonica
CH-923	NP	Shen shui dao	Jiangxi	japonica
CH-924	NP	Zhong yang nuo	Jiangxi	japonica
CH-925	NP	You xu nuo	Jiangxi	japonica
CH-926	NP	Mao gu nuo	Jiangxi	japonica
CH-927	NP	Wu xu nuo	Jiangxi	japonica
CH-928	NP	Jian sheng dao	Guangdong	japonica
CH-929	NP	Dounuo	Guangdong	japonica
CH-930	NP	Men jiao ying	Guangdong	japonica
CH-931	NP	Shan lan nuo-70	Guangdong	japonica
CH-932	NP	Da nuo 4	Guangdong	japonica
CH-933	NP	Bai nuo zi	Guangdong	japonica
CH-934	NP	Yu tuan nuo	Guangdong	japonica
CH-935	NP	Da nuo 5	Guangdong	japonica
CH-936	NP	Niu shi nuo	Guangdong	japonica
CH-937	NP	Da nan nuo	Guangdong	japonica
CH-938	NP	Mian dang	Guangdong	japonica
CH-939	NP	Xiang hua nuo	Guangdong	japonica
CH-940	NP	Li gou nuo	Guangdong	japonica
CH-941	NP	Xiang nuo 3	Guangdong	japonica
CH-942	NP	Gong pai zhong	Guangdong	japonica
CH-943	NP	Long chuan qi zao	Guangdong	japonica
CH-944	NP	Cha zi	Guangdong	japonica
CH-945	NP	Hei xiao nuo	Guangdong	japonica
CH-946	NP	Xiang da nuo	Guangdong	japonica
CH-947	NP	Hei nuo	Guangdong	japonica
CH-948	NP	Hou dong shi	Guangdong	japonica
CH-949	NP	Gong ji nuo	Guangdong	japonica
CH-950	NP	Wu ya nuo	Guangdong	japonica
CH-951	NP	Nuo gu 3	Guangdong	japonica
CH-952	NP	Bai se nuo gu	Guangdong	japonica
CH-953	NP	Kou ma lang	Guangdong	japonica
CH-954	NP	Huang pi nuo	Guangdong	japonica
CH-955	NP	Mian nuo gu	Guangdong	japonica
CH-956	NP	Hei nuo	Guangdong	japonica
CH-957	NP	Shi da hong	Guangdong	japonica
CH-958	NP	Leng shui nuo 3	Guangdong	japonica
CH-959	NP	Da nuo 6	Guangdong	japonica
CH-960	NP	Yang yan nuo	Guangdong	japonica
CH-961	NP	Xiang nuo 4	Guangdong	japonica
CH-962	NP	Huang niu nuo	Guangdong	japonica
CH-963	NP	Hou tun lian	Guangdong	japonica
CH-964	NP	Hou tai	Guangdong	japonica
CH-965	NP	Dong bei nuo	Guangdong	japonica
CH-966	NP	Tong pi nuo	Guangdong	japonica
CH-967	NP	Yue nan xiang nuo	Guangdong	japonica
CH-968	NP	Shi zi nuo	Guangdong	japonica
CH-969	NP	Guang ke xiang nuo	Guangdong	japonica
CH-970	NP	Da nuo 7	Guangdong	japonica
CH-971	NP	Mi feng nuo	Guangdong	japonica
CH-972	NP	Bai mao da nuo	Guangdong	japonica
CH-973	NP	Ben di da nuo	Guangdong	japonica
CH-974	NP	Chanuo	Hubei	japonica
CH-975	NP	Hui zhou gu 2	Hubei	japonica
CH-976	NP	Gao liang dao	Hubei	japonica
CH-977	NP	Gui hua nuo	Hubei	japonica
CH-978	NP	Wu ba nuo	Hubei	japonica
CH-979	NP	Da luo chui	Hubei	japonica
CH-980	NP	Bao ta nuo	Hubei	japonica
CH-981	NP	Pu qibai ke nuo	Hubei	japonica
CH-982	NP	Hu nan nuo	Hubei	japonica
CH-983	NP	Huang hong	Hubei	japonica
CH-984	NP	Nan jing nuo	Hunan	japonica
CH-985	NP	Zhu you nuo	Hunan	japonica
CH-986	NP	Xiang ke nuo	Hunan	japonica
CH-987	NP	Ma nuo gu	Hunan	japonica
CH-988	NP	Wu ke nuo 1	Hunan	japonica
CH-989	NP	Yuan ke nuo	Hunan	japonica
CH-990	NP	Da nuo 8	Hunan	japonica
CH-991	NP	Bai nuo	Hunan	japonica
CH-992	NP	Rong guo	Hunan	japonica
CH-993	NP	Gua zi nuo	Hunan	japonica
CH-994	NP	Hong he 3	Hunan	japonica
CH-995	NP	Guang tou he 1	Hunan	japonica
CH-996	NP	Rong bai	Hunan	japonica
CH-997	NP	Xiang nuo 5	Hunan	japonica
CH-998	NP	Zi nuo	Hunan	japonica
CH-999	NP	Hei ke nuo	Hunan	japonica
CH-1000	NP	Hei ke zhong xuan	Hunan	japonica
CH-1001	NP	Yin shan nuo	Hunan	japonica
CH-1002	NP	Xuan huang nuo	Hunan	japonica
CH-1003	NP	Tie shi nuo	Hunan	japonica
CH-1004	NP	Bai ke nuo 4	Hunan	japonica
CH-1005	NP	Gou wei nuo	Hunan	japonica
CH-1006	NP	pu tao nuo	Jiangsu	japonica
CH-1007	NP	Guan sha nuo	Jiangsu	japonica
CH-1008	NP	Bai ke nuo 5	Jiangsu	japonica
CH-1009	NP	Ji jiao hong	Jiangsu	japonica
CH-1010	NP	Xiang zhi nuo	Jiangsu	japonica
CH-1011	NP	Bai ke nuo 6	Jiangsu	japonica
CH-1012	NP	Hong ke nuo 8	Jiangsu	japonica
CH-1013	NP	Jiang bei nuo	Jiangsu	japonica
CH-1014	NP	Nuo dao	Jiangsu	japonica
CH-1015	NP	Bai ke nuo 7	Jiangsu	japonica
CH-1016	NP	Jiang xi nuo	Jiangsu	japonica
CH-1017	NP	Bao dao	Jiangsu	japonica
CH-1018	NP	Huang jing nuo	Jiangsu	japonica
CH-1019	NP	Yan zi nuo	Jiangsu	japonica
CH-1020	NP	Xian dao nuo	Jiangsu	japonica
CH-1021	NP	Hei ke nuo	Jiangsu	japonica
CH-1022	NP	Hua ke nuo	Jiangsu	japonica
CH-1023	NP	Jiu yue han nuo	Jiangsu	japonica
CH-1024	NP	Qian jin nuo 2	Jiangsu	japonica
CH-1025	NP	Wu mang nuo	Zhejiang	japonica
CH-1026	NP	Bie liu dong	Anhui	japonica
CH-1027	NP	Ka ji nuo	Anhui	japonica
CH-1028	NP	Huang si nuo 5	Anhui	japonica
CH-1029	NP	Wu jie nuo	Anhui	japonica
CH-1030	NP	Zong zi nuo	Jiangxi	japonica
CH-1031	NP	Da dong nuo	Jiangxi	japonica
CH-1032	NP	Bei bei nuo	Jiangxi	japonica
CH-1033	NP	Si ji shui dong nuo	Jiangxi	japonica
CH-1034	NP	Ma wei nuo	Jiangxi	japonica
CH-1035	NP	Bian dan nuo	Jiangxi	japonica
CH-1036	NP	Gui hua nuo	Jiangxi	japonica
CH-1037	NP	Da nuo 9	Jiangxi	japonica
CH-1038	NP	Mang he nuo	Jiangxi	japonica
CH-1039	NP	Zao xian nuo	Jiangxi	japonica
CH-1040	NP	Mian hua nuo	Jiangxi	japonica
CH-1041	NP	Hong ke wan nuo	Jiangxi	japonica
CH-1042	NP	Gao gan nuo 6	Jiangxi	japonica
CH-1043	NP	Chi ke zi	Jiangxi	japonica
CH-1044	NP	Yang xin nuo	Jiangxi	japonica
CH-1045	NP	Chang shen nuo	Jiangxi	japonica
CH-1046	NP	Zhu xue nuo	Jiangxi	japonica
CH-1047	NP	Jiang xuan 300 li	Jiangxi	japonica
CH-1048	NP	Hong ke nuo 9	Jiangxi	japonica
CH-1049	NP	Yang xi nuo	Jiangxi	japonica
CH-1050	NP	Hong ke nuo 10	Jiangxi	japonica
CH-1051	NP	Da dong nuo	Jiangxi	japonica
CH-1052	NP	Niu pi nuo	Jiangxi	japonica
CH-1053	NP	Hong ke da nuo	Guangxi	japonica
CH-1054	NP	Hong rong nuo	Guangxi	japonica
CH-1055	NP	Hong ying nuo	Hubei	japonica
CH-1056	NP	Wu zui nuo	Hubei	japonica
CH-1057	NP	Gao liang nuo	Hubei	japonica
CH-1058	NP	Yue yang nuo	Hubei	japonica
CH-1059	NP	Hong ke nuo 11	Hubei	japonica
CH-1060	NP	Mian zi nuo	Hubei	japonica
CH-1061	NP	Hong nuo 1	Hubei	japonica
CH-1062	NP	Dong nuo 1	Hubei	japonica
CH-1063	NP	Yue liang huang	Hubei	japonica
CH-1064	NP	Leng xi nuo	Hunan	japonica
CH-1065	NP	Hei jie nuo	Hunan	japonica
CH-1066	NP	Bai sha nuo	Hunan	japonica
CH-1067	NP	Hei jiao nuo	Hunan	japonica
CH-1068	NP	Xiang ke nuo 4	Hunan	japonica
CH-1069	NP	Niu wei nuo	Hunan	japonica
CH-1070	NP	Bai si nuo	Hunan	japonica
CH-1071	NP	Rong he 3	Hunan	japonica
CH-1072	NP	Hei jie nuo 1	Hunan	japonica
CH-1073	NP	Tuan xiang	Yunnan	japonica
CH-1074	NP	Zao hong lian	Jiangsu	indica
CH-1075	NP	Tuan li xian	Jiangsu	indica
CH-1076	NP	Jiang yin zao	Jiangsu	indica
CH-1077	NP	You mang han dao	Jiangsu	japonica
CH-1078	NP	Ai jiao huang	Jiangsu	indica
CH-1079	NP	Xiang nuo dao	Jiangsu	japonica
CH-1080	NP	Liu shi zi	Jiangsu	indica
CH-1081	NP	San chao qi	Jiangsu	indica
CH-1082	NP	Huai hua nuo	Jiangsu	japonica
CH-1083	NP	Zhuang yuan hong nuo	Jiangsu	japonica
CH-1084	NP	Hou zi tou	Jiangsu	indica
CH-1085	NP	Jiu yue han	Jiangsu	japonica
CH-1086	NP	Hu pi xian	Jiangsu	indica
CH-1087	NP	Huang ke nuo 6	Jiangsu	japonica
CH-1088	NP	Niu jiao nuo	Jiangsu	japonica
CH-1089	NP	Hong pu gan	Jiangsu	indica
CH-1090	NP	Gou er nuo	Jiangsu	japonica
CH-1091	NP	Ai jiao hu	Jiangsu	japonica
CH-1092	NP	San shi zi	Jiangsu	indica
CH-1093	NP	Xia zi xian	Jiangsu	indica
CH-1094	NP	Nan tong dao	Jiangsu	japonica
CH-1095	NP	Tuan er xian	Jiangsu	indica
CH-1096	NP	Niu jiao bian nuo	Jiangsu	japonica
CH-1097	NP	Xiang jing nuo	Jiangsu	japonica
CH-1098	NP	Ma que nuo	Jiangsu	japonica
CH-1099	NP	Xiao wan dao	Jiangsu	japonica
CH-1100	NP	Xiang jing nuo 1	Jiangsu	japonica
CH-1101	NP	Hei dao	Jiangsu	japonica
CH-1102	NP	Liu shi liu huang	Jiangsu	indica
CH-1103	NP	Tuan tou han	Jiangsu	indica
CH-1104	NP	Cu gan li zhi hong	Zhejiang	japonica
CH-1105	NP	Tian ji qing	Zhejiang	japonica
CH-1106	NP	Qi tou huang	Zhejiang	indica
CH-1107	NP	Qi huang dao	Zhejiang	indica
CH-1108	NP	San li cun	Zhejiang	indica
CH-1109	NP	Hua gu	Zhejiang	indica
CH-1110	NP	Bai mi dong	Zhejiang	indica
CH-1111	NP	Chi shu he	Zhejiang	indica
CH-1112	NP	Yi zhi qing	Zhejiang	indica
CH-1113	NP	Ye zhu wan	Zhejiang	japonica
CH-1114	NP	Ai da zhong	Zhejiang	japonica
CH-1115	NP	Wu ke jing dao	Zhejiang	japonica
CH-1116	NP	Wu ke dao 1	Zhejiang	japonica
CH-1117	NP	Si chuan nuo	Zhejiang	indica
CH-1118	NP	Shou chang man gu	Zhejiang	japonica
CH-1119	NP	Liu shi ri	Zhejiang	indica
CH-1120	NP	Wu zhou nuo	Zhejiang	japonica
CH-1121	NP	Ai wu dao	Zhejiang	japonica
CH-1122	NP	Huang hei tou hong	Zhejiang	japonica
CH-1123	NP	Tao zi nuo	Anhui	japonica
CH-1124	NP	San li cun 1	Anhui	indica
CH-1125	NP	Da ye zi zao	Anhui	indica
CH-1126	NP	Jiu huang zao	Anhui	indica
CH-1127	NP	Bang qiu nuo	Anhui	indica
CH-1128	NP	Qi tou bai	Anhui	indica
CH-1129	NP	Hong nuo gu	Anhui	indica
CH-1130	NP	Nan feng zao	Anhui	indica
CH-1131	NP	Ban mao zhan	Anhui	indica
CH-1132	NP	Hong qi zao	Anhui	indica
CH-1133	NP	Tuan gu zi	Anhui	indica
CH-1134	NP	Ai da zao	Anhui	indica
CH-1135	NP	Xiao hong zui	Anhui	indica
CH-1136	NP	Man dao	Anhui	japonica
CH-1137	NP	Zhong jing dao	Anhui	japonica
CH-1138	NP	Fei dong tang dao	Anhui	japonica
CH-1139	NP	Ji zhua xian	Anhui	indica
CH-1140	NP	You liu dou	Anhui	japonica
CH-1141	NP	Lai pi tang dao	Anhui	japonica
CH-1142	NP	Ka ji nuo 1	Anhui	japonica
CH-1143	NP	Xiao dong dao	Anhui	indica
CH-1144	NP	Guo di hei	Anhui	indica
CH-1145	NP	Lang xi hong jing	Anhui	japonica
CH-1146	NP	Ning guo nuo	Anhui	japonica
CH-1147	NP	Zhong yang bai	Anhui	indica
CH-1148	NP	Huang si nuo 6	Anhui	japonica
CH-1149	NP	Bai ri zao	Anhui	indica
CH-1150	NP	Ye li suo	Anhui	indica
CH-1151	NP	Lin xi bai	Anhui	indica
CH-1152	NP	Da ye li suo	Anhui	indica
CH-1153	NP	Diao si ji	Anhui	japonica
CH-1154	NP	Leng shui nuo 4	Anhui	japonica
CH-1155	NP	Kuo ye xian	Anhui	indica
CH-1156	NP	Jing ai nuo	Anhui	indica
CH-1157	NP	Chang li gu	Anhui	indica
CH-1158	NP	Shui bai tiao	Anhui	indica
CH-1159	NP	Jia gou xiang dao	Anhui	japonica
CH-1160	NP	Bai mi zao	Jiangxi	indica
CH-1161	NP	Gai mian xian	Jiangxi	indica
CH-1162	NP	Wan chi bai	Jiangxi	indica
CH-1163	NP	Ai jiao bai	Jiangxi	indica
CH-1164	NP	Zao he hong	Jiangxi	indica
CH-1165	NP	Chong ren gao jiao zi	Jiangxi	indica
CH-1166	NP	Fu zhou zao	Jiangxi	indica
CH-1167	NP	Guan yin xian	Jiangxi	indica
CH-1168	NP	Xiang shan you nuo zi	Jiangxi	japonica
CH-1169	NP	Leng shui nuo 5	Jiangxi	indica
CH-1170	NP	Xi hu zao	Jiangxi	indica
CH-1171	NP	Da dong nuo	Jiangxi	japonica
CH-1172	NP	Chi gu nuo	Jiangxi	indica
CH-1173	NP	Ji hua nuo	Jiangxi	japonica
CH-1174	NP	Han lu nuo	Jiangxi	japonica
CH-1175	NP	Hong ke nuo 12	Jiangxi	japonica
CH-1176	NP	Hong ke nuo 13	Jiangxi	japonica
CH-1177	NP	Mian hua nuo 1	Jiangxi	japonica
CH-1178	NP	Wang ding nuo	Jiangxi	japonica
CH-1179	NP	Wu xu nuo 1	Jiangxi	japonica
CH-1180	NP	Bai ke nuo 8	Jiangxi	japonica
CH-1181	NP	Er he hong	Jiangxi	japonica
CH-1182	NP	Hou sheng nuo	Jiangxi	japonica
CH-1183	NP	300 li wan nuo gu	Jiangxi	japonica
CH-1184	NP	Han nuo 8	Jiangxi	japonica
CH-1185	NP	Shun shui tuo	Jiangxi	indica
CH-1186	NP	Bai mao nuo	Jiangxi	japonica
CH-1187	NP	Hong ke nuo 14	Jiangxi	japonica
CH-1188	NP	Leng shui nuo 6	Jiangxi	japonica
CH-1189	NP	Ye he zi	Jiangxi	indica
CH-1190	NP	Mao nuo	Jiangxi	japonica
CH-1191	NP	Mao nuo	Jiangxi	japonica
CH-1192	NP	Hong ke nuo 15	Jiangxi	japonica
CH-1193	NP	Huang si nuo 7	Jiangxi	indica
CH-1194	NP	Liu tou nuo	Jiangxi	japonica
CH-1195	NP	Hong ke nuo 16	Jiangxi	japonica
CH-1196	NP	Gou shi nuo	Jiangxi	japonica
CH-1197	NP	Han nuo 9	Jiangxi	japonica
CH-1198	NP	Chi he bei	Jiangxi	japonica
CH-1199	NP	Gao feng nuo	Jiangxi	japonica
CH-1200	NP	Gao gan da nuo	Jiangxi	japonica
CH-1201	NP	Da nuo 9	Jiangxi	japonica
CH-1202	NP	Shen shui dao	Jiangxi	japonica
CH-1203	NP	Gui hua nuo	Jiangxi	japonica
CH-1204	NP	Li dong nuo	Jiangxi	japonica
CH-1205	NP	Mao nuo	Jiangxi	japonica
CH-1206	NP	Zhu bian wan	Jiangxi	indica
CH-1207	NP	Mian hua nuo 2	Jiangxi	japonica
CH-1208	NP	Zhi ma nuo	Jiangxi	japonica
CH-1209	NP	Xue he	Guangxi	indica
CH-1210	NP	Da hong gu	Guangxi	indica
CH-1211	NP	Chong zuo li nuo gu	Guangxi	indica
CH-1212	NP	Ba yue gu 1	Guangxi	indica
CH-1213	NP	Zao huang zhan dong	Guangxi	indica
CH-1214	NP	Da he nuo 2	Guangxi	indica
CH-1215	NP	Zao ma zhan	Guangxi	indica
CH-1216	NP	Leng shui zhan	Guangxi	indica
CH-1217	NP	Da dong bai ke	Guangxi	indica
CH-1218	NP	Xue hua	Guangxi	indica
CH-1219	NP	Huang zhan	Guangxi	indica
CH-1220	NP	Da wang bai	Guangxi	indica
CH-1221	NP	Mu gu	Guangxi	indica
CH-1222	NP	Yu miao da ye zhan	Guangxi	indica
CH-1223	NP	Sha zhan	Guangxi	indica
CH-1224	NP	Gu zhan you	Guangxi	indica
CH-1225	NP	Ding he	Guangxi	indica
CH-1226	NP	Ai jiao hong mi	Guangxi	indica
CH-1227	NP	Tai gu you	Guangxi	indica
CH-1228	NP	Hong jiao gu	Guangxi	indica
CH-1229	NP	Hao you zhan	Guangxi	indica
CH-1230	NP	Gua ba zhan luo	Guangxi	japonica
CH-1231	NP	Min mu gu	Guangxi	indica
CH-1232	NP	Jiu shi zao	Guangxi	indica
CH-1233	NP	Xi you zhan	Guangxi	indica
CH-1234	NP	Yuan yang gu	Guangxi	indica
CH-1235	NP	Dong ya zhan	Guangxi	indica
CH-1236	NP	Xun zao	Guangxi	indica
CH-1237	NP	Zheng yang zhan	Guangxi	indica
CH-1238	NP	Xiang nuo 6	Guangxi	japonica
CH-1239	NP	Shui shen he	Guangxi	indica
CH-1240	NP	Wu ming hong ju	Guangxi	indica
CH-1241	NP	Hei nuo gu	Guangxi	japonica
CH-1242	NP	Guang hua	Guangxi	indica
CH-1243	NP	San bu pa	Guangxi	indica
CH-1244	NP	Bei zi nuo 1	Guangxi	japonica
CH-1245	NP	Da hua nuo	Guangxi	japonica
CH-1246	NP	Han nuo 10	Guangxi	japonica
CH-1247	NP	Hua ke nuo	Guangxi	japonica
CH-1248	NP	Jing xiang nuo	Guangxi	japonica
CH-1249	NP	Zao huang nuo gu	Guangxi	japonica
CH-1250	NP	Hou suan wai	Guangxi	japonica
CH-1251	NP	Huo zhan dao	Guangxi	indica
CH-1252	NP	Wu ya nuo	Guangxi	japonica
CH-1253	NP	Ba jing bai sha nuo	Hubei	japonica
CH-1254	NP	Hong an qi tou huang	Hubei	indica
CH-1255	NP	Hong an she dong nuo	Hubei	japonica
CH-1256	NP	Tuo er zhan	Hubei	indica
CH-1257	NP	Ma cheng tuo er nuo	Hubei	japonica
CH-1258	NP	Li ke nuo	Hubei	japonica
CH-1259	NP	Wu ju nuo	Hubei	indica
CH-1260	NP	Xian ma nuo	Hubei	japonica
CH-1261	NP	Xue hua nuo	Hubei	japonica
CH-1262	NP	E lian bai nuo	Hubei	japonica
CH-1263	NP	Tai ping nuo	Hubei	indica
CH-1264	NP	Cao xie nuo	Hubei	japonica
CH-1265	NP	Qian jin zao	Hubei	indica
CH-1266	NP	Hou bei nuo	Hubei	japonica
CH-1267	NP	Tuan ke nuo	Hubei	japonica
CH-1268	NP	Zi se dao	Hubei	indica
CH-1269	NP	Xin heng yi hao	Hubei	japonica
CH-1270	NP	Ma ke zhan	Hubei	indica
CH-1271	NP	Yang hu nuo	Hubei	indica
CH-1272	NP	Zhong xiang ben di nuo	Hubei	indica
CH-1273	NP	Bai ke nuo 9	Hubei	japonica
CH-1274	NP	Jin gua zi	Hubei	indica
CH-1275	NP	Zi hei ke yu gu	Hubei	japonica
CH-1276	NP	San ke cun nuo gu	Hubei	indica
CH-1277	NP	Bei zi nuo 2	Hubei	japonica
CH-1278	NP	Zi gan nan gu	Hubei	indica
CH-1279	NP	Huang jin nuo	Hubei	japonica
CH-1280	NP	Zi gui leng shui gu	Hubei	indica
CH-1281	NP	Shen xian dao	Hubei	japonica
CH-1282	NP	Ba dong bai ri zao	Hubei	indica
CH-1283	NP	Bai zi gu	Hubei	japonica
CH-1284	NP	Xian zi nuo	Hubei	japonica
CH-1285	NP	Xuan dong gui yang zhan	Hubei	indica
CH-1286	NP	Xuan dong jin bao yin	Hubei	japonica
CH-1287	NP	Bai sha nuo 2	Hubei	japonica
CH-1288	NP	Ma zao gu	Hubei	indica
CH-1289	NP	Da sui jing	Hubei	japonica
CH-1290	NP	Nuo gu	Hubei	japonica
CH-1291	NP	Liu tiao nuo	Hubei	indica
CH-1292	NP	Bei zi nuo 3	Hubei	indica
CH-1293	NP	Ai gan bai qiao	Hubei	indica
CH-1294	NP	Jin zi huang	Hubei	japonica
CH-1295	NP	Bei zi zhan	Hubei	indica
CH-1296	NP	Huang la nuo 2	Hubei	japonica
CH-1297	NP	Ba shi zao	Hunan	indica
CH-1298	NP	Yi mian zhan	Hunan	indica
CH-1299	NP	Niu wei zhan	Hunan	indica
CH-1300	NP	Da he zhan	Hunan	indica
CH-1301	NP	San ri qi	Hunan	indica
CH-1302	NP	Chang sha zhan	Hunan	indica
CH-1303	NP	Bai jiao yang he	Hunan	indica
CH-1304	NP	Qi shi zao	Hunan	indica
CH-1305	NP	Hong jiao zao	Hunan	indica
CH-1306	NP	Yi qiu shui	Hunan	indica
CH-1307	NP	Yang gu zao	Hunan	indica
CH-1308	NP	Bai ji zhan	Hunan	indica
CH-1309	NP	Hou jiao zao	Hunan	indica
CH-1310	NP	Zao nuo gu 1	Hunan	japonica
CH-1311	NP	Da ye hong mao	Hunan	indica
CH-1312	NP	Xi yang zhan	Hunan	indica
CH-1313	NP	Da tan zhan	Hunan	indica
CH-1314	NP	Ai jiao li gu	Hunan	indica
CH-1315	NP	San hua zhan	Hunan	indica
CH-1316	NP	Zhu you nuo	Hunan	indica
CH-1317	NP	Xin ning zhan	Hunan	indica
CH-1318	NP	Bai ma gu 1	Hunan	indica
CH-1319	NP	Er shui zao 1	Hunan	indica
CH-1320	NP	Tao yuan he	Hunan	indica
CH-1321	NP	Ping bai gu	Hunan	indica
CH-1322	NP	Zao ma zhan	Hunan	indica
CH-1323	NP	Zhong xi liu shi zhan	Hunan	indica
CH-1324	NP	Qi tou huang 1	Hunan	indica
CH-1325	NP	Da sui gao gan	Hunan	japonica
CH-1326	NP	Tai shan nuo	Hunan	indica
CH-1327	NP	Qi tou huang 2	Hunan	indica
CH-1328	NP	Bai li nuo	Hunan	japonica
CH-1329	NP	Leng shui ma	Hunan	indica
CH-1330	NP	Bai jiao zao	Hunan	indica
CH-1331	NP	Yi gen dao	Hunan	indica
CH-1332	NP	Ben di gu	Hunan	indica
CH-1333	NP	Xu nuo	Hunan	japonica
CH-1334	NP	Jing shui nuo	Hunan	japonica
CH-1335	NP	Ba nuo	Hunan	japonica
CH-1336	NP	Bai mao nuo	Hunan	japonica
CH-1337	NP	Ba bai li	Hunan	indica
CH-1338	NP	Xiang gu nuo	Hunan	japonica
CH-1339	NP	Jiu zi nuo	Hunan	japonica
CH-1340	NP	Ji zi gu	Yunnan	japonica
CH-1341	NP	Hao nuo nai	Yunnan	japonica
CH-1342	NP	Chang mao gu	Yunnan	japonica
CH-1343	NP	Hao dong lang	Yunnan	indica
CH-1344	NP	Ao yong bang	Yunnan	japonica
CH-1345	NP	Niao zui qi tou	Yunnan	indica
CH-1346	NP	Hei jie ba	Yunnan	japonica
CH-1347	NP	Hao gan	Yunnan	japonica
CH-1348	NP	Hao nuo wang	Yunnan	indica
CH-1349	NP	Hua nuo 1	Yunnan	japonica
CH-1350	NP	Hao gan da wai	Yunnan	indica
CH-1351	NP	Gou shi nuo	Yunnan	japonica
CH-1352	NP	Duan jiao nuo	Yunnan	japonica
CH-1353	NP	hei nuo	Yunnan	japonica
CH-1354	NP	Da bai gu	Yunnan	japonica
CH-1355	NP	Mi ba	Yunnan	indica
CH-1356	NP	Xiao lao jing	Yunnan	indica
CH-1357	NP	Xiao hong nuo 1	Yunnan	japonica
CH-1358	NP	Lao jing hong jiao	Yunnan	indica
CH-1359	NP	Da li zao xian	Yunnan	indica
CH-1360	NP	Bai xiang nuo gu	Yunnan	japonica
CH-1361	NP	Hong gu	Yunnan	indica
CH-1362	NP	Qi shi zao	Yunnan	indica
CH-1363	NP	Hong sa gu	Yunnan	japonica
CH-1364	NP	Ai zi qi	Yunnan	indica
CH-1365	NP	Mao xiang gu	Yunnan	japonica
CH-1366	NP	Ben di hong gu	Yunnan	japonica
CH-1367	NP	Yuan bang gu	Yunnan	indica
CH-1368	NP	Da xiang nuo 1	Yunnan	japonica
CH-1369	NP	Da bai gu	Yunnan	indica
CH-1370	NP	Da xiang nuo 2	Yunnan	japonica
CH-1371	NP	Kao bu li	Yunnan	japonica
CH-1372	NP	Chang mao gu	Yunnan	japonica
CH-1373	NP	Hua ke nuo	Yunnan	japonica
CH-1374	NP	Hong han nuo	Yunnan	japonica
CH-1375	NP	Niu shi gu	Yunnan	indica
CH-1376	NP	Hao nuo lang	Yunnan	japonica
CH-1377	NP	Da hong gu	Yunnan	japonica
CH-1378	NP	Wu ju nuo	Yunnan	indica
CH-1379	NP	Hong xing nuo	Yunnan	japonica
CH-1380	NP	Wu li xiang 1	Yunnan	japonica
CH-1381	NP	Huang si gu	Yunnan	japonica
CH-1382	NP	Xiao bai diao	Yunnan	indica
CH-1383	NP	Pen gu	Yunnan	japonica
CH-1384	NP	Hong gu 2	Yunnan	indica
CH-1385	NP	Hei gu	Yunnan	japonica
CH-1386	NP	Hei gu	Yunnan	japonica
CH-1387	NP	San he xiao bai gu	Yunnan	japonica
CH-1388	NP	Wu yue huang	Yunnan	indica
CH-1389	NP	Lao lai hong nuo gu	Yunnan	japonica
CH-1390	NP	Da bai ma	Yunnan	indica
CH-1391	NP	Hong ke nuo 17	Yunnan	japonica
CH-1392	NP	Zao ai jiao	Yunnan	indica
CH-1393	NP	Ai zi nuo 4	Yunnan	japonica
CH-1394	NP	Bei zi nuo 4	Yunnan	japonica
CH-1395	NP	Shuang wei gu	Yunnan	indica
CH-1396	NP	Huang ke nuo 7	Yunnan	japonica
CH-1397	NP	E shan da bai gu	Yunnan	indica
CH-1398	NP	Zhu shi nuo	Yunnan	japonica
CH-1399	NP	Bai jiu gu	Yunnan	japonica
CH-1400	NP	Da bai gu	Yunnan	japonica
CH-1401	NP	Gao nuo gu	Yunnan	japonica
CH-1402	NP	Hong mang da ding	Yunnan	japonica
CH-1403	NP	Duan zi wu sao	Yunnan	indica
CH-1404	NP	Da hei gu	Yunnan	japonica
CH-1405	NP	Yang yu zan	Yunnan	indica
CH-1406	NP	Zan lue	Yunnan	japonica
CH-1407	NP	Hei gu	Yunnan	japonica
CH-1408	NP	Luo luo gu	Yunnan	japonica
CH-1409	NP	Chang mang nuo	Yunnan	indica
CH-1410	NP	Zao zheng	Guangdong	indica
CH-1411	NP	Wu ke nuo 2	Guangdong	indica
CH-1412	NP	Qiu yang zao	Guangdong	indica
CH-1413	NP	Zao ma bao	Guangdong	indica
CH-1414	NP	Ren hua hong tou nuo (zhan )	Guangdong	indica
CH-1415	NP	Ru yuan bai	Guangdong	indica
CH-1416	NP	Bai tou you zhan	Guangdong	indica
CH-1417	NP	Ying de rong zhan	Guangdong	indica
CH-1418	NP	Niu shi zhan	Guangdong	indica
CH-1419	NP	Nan xiong xia zhi bai	Guangdong	indica
CH-1420	NP	Ai jiao hong tou he	Guangdong	indica
CH-1421	NP	Hei jun zi	Guangdong	indica
CH-1422	NP	Jin hua zao	Guangdong	indica
CH-1423	NP	Di chi zhong	Guangdong	indica
CH-1424	NP	Sao ba jue	Guangdong	indica
CH-1425	NP	Mi zi zhan	Guangdong	indica
CH-1426	NP	Jian bi zi	Guangdong	indica
CH-1427	NP	Xin yi da bai	Guangdong	indica
CH-1428	NP	Zao shui yin zhan	Guangdong	indica
CH-1429	NP	Han dao	Guangdong	indica
CH-1430	NP	Hua yao zi	Guangdong	indica
CH-1431	NP	En ping yang guang bai	Guangdong	indica
CH-1432	NP	Dai mi zi	Guangdong	indica
CH-1433	NP	Da hua ke	Guangdong	indica
CH-1434	NP	Da mao bao	Guangdong	indica
CH-1435	NP	Hei nuo 5	Guangdong	indica
CH-1436	NP	He yuan jia ying zao	Guangdong	indica
CH-1437	NP	Zhe gu zao	Guangdong	indica
CH-1438	NP	Jie yang san ye qi	Guangdong	indica
CH-1439	NP	Da he nuo	Guangdong	indica
CH-1440	WR	YD1-234	Guangdong	indica
CH-1441	WR	YD1-331	Guangdong	indica
CH-1442	WR	YD1-593	Guangdong	indica
CH-1443	WR	YD1-608	Guangdong	indica
CH-1444	WR	YD1-637	Guangdong	indica
CH-1445	WR	YD1-642	Guangdong	indica
CH-1446	WR	YD1-780	Guangdong	indica
CH-1447	WR	YD1-853	Guangdong	indica
CH-1448	WR	YD1-1464	Guangdong	indica
CH-1449	WR	YD1-1531	Guangdong	indica
CH-1450	WR	YD1-1800	Guangdong	indica
CH-1451	WR	YD1-2727	Guangdong	indica
CH-1452	WR	YD1-2728	Guangdong	indica
CH-1453	WR	YD1-2795	Guangdong	indica
CH-1454	WR	YD2-6	Guangxi	indica
CH-1455	WR	YD2-7	Guangxi	indica
CH-1456	WR	YD2-10	Guangxi	japonica
CH-1457	WR	YD2-12	Guangxi	japonica
CH-1458	WR	YD2-153	Guangxi	indica
CH-1459	WR	YD2-212	Guangxi	japonica
CH-1460	WR	YD2-220	Guangxi	japonica
CH-1461	WR	YD2-223	Guangxi	japonica
CH-1462	WR	YD2-227	Guangxi	indica
CH-1463	WR	YD2-230	Guangxi	japonica
CH-1464	WR	YD2-251	Guangxi	indica
CH-1465	WR	YD2-258	Guangxi	indica
CH-1466	WR	YD2-277	Guangxi	indica
CH-1467	WR	YD2-284	Guangxi	indica
CH-1468	WR	YD2-294	Guangxi	indica
CH-1469	WR	YD2-298	Guangxi	indica
CH-1470	WR	YD2-302	Guangxi	indica
CH-1471	WR	YD2-303	Guangxi	indica
CH-1472	WR	YD2-396	Guangxi	indica
CH-1473	WR	YD2-400	Guangxi	indica
CH-1474	WR	YD2-408	Guangxi	indica
CH-1475	WR	YD2-409	Guangxi	indica
CH-1476	WR	YD2-414	Guangxi	indica
CH-1477	WR	C46	Hunan	indica
CH-1478	WR	YD6-0115	Hunan	indica
CH-1479	WR	C49	Hunan	indica
CH-1480	WR	YD6-0134	Hunan	indica
CH-1481	WR	YD6-0154	Hunan	indica
Most rice landraces are named by local farmers based on their biological characteristics, quality, and other characteristics, hence there's a namesake in the list.
